# Supplementary material for: Phenotypic variability in bread wheat root systems at the early vegetative stage
Source: PubMed Central journal article supplement (PMC7189723; doi:10.1186/s12870-020-02390-8), 2020-04-28
Supplement: 12870_2020_2390_MOESM1_ESM.pdf [file 12870_2020_2390_MOESM1_ESM.pdf]

**Table S1.** Descriptive statistics of additional 16 root traits (root area, root volume and root length density of the whole root system and of root sections, and root growth rate) in 184 wheat genotypes grown in a semi-hydroponic phenotyping platform.

| Trait                                 | Abbreviation | Minimum | Maximum | Mean | Median | Std. deviation | CV          | Significance |
|---------------------------------------|--------------|---------|---------|------|--------|----------------|-------------|--------------|
| Total root area                       | RA           | 65.7    | 319     | 181  | 182    | 50.8           | <b>0.28</b> | <b>0.000</b> |
| Total root volume                     | RV           | 0.50    | 2.59    | 1.40 | 1.36   | 0.39           | <b>0.28</b> | <b>0.000</b> |
| Root length density                   | RLD          | 0.47    | 2.47    | 1.33 | 1.35   | 0.39           | <b>0.29</b> | <b>0.000</b> |
| Root area s1                          | RA_s1        | 23.9    | 121     | 63.8 | 63.9   | 19.5           | <b>0.31</b> | <b>0.000</b> |
| Root volume s1                        | RV_s1        | 0.17    | 0.93    | 0.48 | 0.47   | 0.15           | <b>0.31</b> | <b>0.000</b> |
| Root length density s1                | RLD_s1       | 1.00    | 4.79    | 2.64 | 2.67   | 0.82           | <b>0.31</b> | <b>0.000</b> |
| Root area s2                          | RA_s2        | 13.4    | 108     | 56.2 | 55.6   | 17.9           | <b>0.32</b> | <b>0.000</b> |
| Root volume s2                        | RV_s2        | 0.12    | 0.79    | 0.39 | 0.38   | 0.12           | <b>0.31</b> | <b>0.000</b> |
| Root length density s2                | RLD_s2       | 0.36    | 5.05    | 2.51 | 2.51   | 0.83           | <b>0.33</b> | <b>0.000</b> |
| Root area s3                          | RA_s3        | 11.0    | 135     | 61.1 | 60.3   | 23.4           | <b>0.38</b> | <b>0.000</b> |
| Root volume s3                        | RV_s3        | 0.15    | 1.23    | 0.54 | 0.51   | 0.20           | <b>0.37</b> | <b>0.000</b> |
| Root length density s3                | RLD_s3       | 0.07    | 1.39    | 0.62 | 0.62   | 0.25           | <b>0.40</b> | <b>0.000</b> |
| Root area in sub-root layer           | RA_sub       | 24.4    | 229     | 117  | 117    | 37.8           | <b>0.32</b> | <b>0.000</b> |
| Root volume in sub-root layer         | RV_sub       | 0.26    | 1.95    | 0.93 | 0.90   | 0.29           | <b>0.31</b> | <b>0.000</b> |
| Root length density in sub-root layer | RLD_sub      | 0.43    | 6.30    | 3.13 | 3.13   | 1.02           | <b>0.33</b> | <b>0.000</b> |
| Root growth rate                      | RGR          | 1.23    | 4.39    | 3.04 | 3.07   | 0.53           | 0.17        | <b>0.000</b> |

All the 16 root traits except RGR had CVs (coefficients of variation)  $\geq 0.25$  (appeared in red and bold type). Probability (*P*) values were based on a GLM multivariate analysis of 184 genotypes (see Table 3 for units of each trait).

**Table S2.** Wheat genotypes ranked in the top or bottom 20 genotypes for total root length (RL) of the 184 genotypes, some of which were also ranked in the top or bottom 20 for other traits.

| Code #                                                       | Genotype name        | RL | RL_s1 | RL_sub | RGR | RM | SM |
|--------------------------------------------------------------|----------------------|----|-------|--------|-----|----|----|
| 6                                                            | Hopea                | ♥  | ♥     | ♥      | ♥   | ♥  | ♥  |
| 41                                                           | Bahatans 87          | ♥  | ♥     | ♥      |     | ♥  | ♥  |
| 21                                                           | Ghurka               | ♥  |       | ♥      |     | ♥  | ♥  |
| 34                                                           | Seu Seun 27          | ♥  |       | ♥      | ♥   | ♥  |    |
| 16                                                           | Ardito               | ♥  | ♥     | ♥      | ♥   | ♥  |    |
| 25                                                           | Orlandi              | ♥  |       | ♥      |     | ♥  |    |
| 50                                                           | Kulung               | ♥  | ♥     |        |     | ♥  | ♥  |
| 71                                                           | Austro Bankut        | ♥  | ♥     | ♥      |     |    |    |
| 52                                                           | Nachipundo           | ♥  | ♥     | ♥      |     |    | ♥  |
| 35                                                           | Blueboy              | ♥  |       | ♥      |     | ♥  | ♥  |
| 9                                                            | Redman               | ♥  |       | ♥      |     | ♥  | ♥  |
| 92                                                           | Corin                | ♥  |       | ♥      |     | ♥  |    |
| 2                                                            | College Eclipse      | ♥  |       | ♥      | ♥   |    | ♥  |
| 59                                                           | Cotipora             | ♥  |       | ♥      | ♥   |    |    |
| 82                                                           | Rongotea             | ♥  |       | ♥      |     |    |    |
| 4                                                            | Flint                | ♥  |       |        |     | ♥  |    |
| 44                                                           | Weibullsholm Jo 3045 | ♥  | ♥     |        |     | ♥  |    |
| 8                                                            | Pitic 62             | ♥  |       | ♥      |     |    |    |
| 15                                                           | Arawa                | ♥  |       | ♥      | ♥   | ♥  | ♥  |
| 26                                                           | Blondynka            | ♥  |       | ♥      |     | ♥  | ♥  |
| <b>Genotypes ranked in the lower 20 for root length (RL)</b> |                      |    |       |        |     |    |    |
| 123                                                          | Cobra                | ♦  |       | ♦      | ♦   | ♦  | ♦  |
| 83                                                           | Buck Buck S          | ♦  | ♦     |        |     | ♦  |    |
| 177                                                          | Machete              | ♦  | ♦     |        |     |    |    |
| 28                                                           | Richelle             | ♦  | ♦     |        |     |    |    |
| 75                                                           | Songlen              | ♦  | ♦     |        |     |    |    |
| 126                                                          | Mace                 | ♦  |       | ♦      | ♦   | ♦  | ♦  |
| 164                                                          | Excalibar            | ♦  | ♦     | ♦      | ♦   | ♦  |    |
| 133                                                          | Hydra                | ♦  | ♦     | ♦      |     | ♦  | ♦  |
| 121                                                          | Bonnie Rock          | ♦  | ♦     | ♦      |     | ♦  |    |
| 142                                                          | Scepter              | ♦  |       | ♦      | ♦   |    | ♦  |
| 96                                                           | Turda 81             | ♦  |       | ♦      | ♦   |    |    |
| 138                                                          | Drysdale             | ♦  | ♦     | ♦      |     |    |    |
| 134                                                          | Impress CI Plus      | ♦  |       | ♦      | ♦   | ♦  | ♦  |
| 178                                                          | Magsil 30            | ♦  | ♦     |        |     | ♦  |    |
| 139                                                          | Grenade CI Plus      | ♦  |       | ♦      | ♦   | ♦  | ♦  |
| 132                                                          | Harper               | ♦  | ♦     | ♦      | ♦   | ♦  | ♦  |
| 119                                                          | W7984                | ♦  |       | ♦      | ♦   |    |    |
| 136                                                          | Trojan               | ♦  | ♦     | ♦      | ♦   | ♦  | ♦  |
| 79                                                           | Limpopo              | ♦  | ♦     | ♦      | ♦   | ♦  |    |
| 157                                                          | Tincurrin            | ♦  | ♦     | ♦      |     | ♦  | ♦  |

Root length (RL), RL in top 20 cm section (RL\_s1), RL in the section below 20 cm (RL\_sub), root growth rate (RGR), root mass (RM), and shoot mass (SM).

**Table S3.** General Linear Model (GLM) multivariate analysis for plant position as a main effect in selected root traits (shoot height, root mass and shoot mass).

| Source                 |              | Type III<br>Sum of Squares | DF  | Mean Square | <i>F</i> | Sig.  |
|------------------------|--------------|----------------------------|-----|-------------|----------|-------|
| <b>Corrected Model</b> | Shoot height | 2.21                       | 1   | 2.20        | 0.032    | 0.858 |
|                        | Root mass    | 11708                      | 1   | 11708.01    | 2.621    | 0.106 |
|                        | Shoot mass   | 16966                      | 1   | 16966.49    | 1.416    | 0.235 |
| <b>Plant position</b>  | Shoot height | 2                          | 1   | 2.20        | 0.032    | 0.858 |
|                        | Root mass    | 11708                      | 1   | 11708.01    | 2.621    | 0.106 |
|                        | Shoot mass   | 16966                      | 1   | 16966.49    | 1.416    | 0.235 |
| <b>Error</b>           | Shoot height | 37071                      | 540 | 68.65       |          |       |
|                        | Root mass    | 2412327                    | 540 | 4467.27     |          |       |
|                        | Shoot mass   | 6471773                    | 540 | 11984.77    |          |       |

Table S4 Pearson's correlation matrix for 25 traits (including 21 root traits and 4 shoot traits) in 184 wheat genotypes.

| Trait      | SRLZ2 | MRD | SRN | RL | RD | SRL | RLI | RTD | RL_s1 | RD_s1 | RL_s2 | RD_s2 | RL_s3 | RD_s3 | sub | RLR_s1 | sub | RD_s1 | sub | RLR_s1 | sub | RD_s1 | sub | RM | SM | TDM | RMR | SH | LN | TN |    |
|------------|-------|-----|-----|----|----|-----|-----|-----|-------|-------|-------|-------|-------|-------|-----|--------|-----|-------|-----|--------|-----|-------|-----|----|----|-----|-----|----|----|----|----|
| SRLZ1      | **    | **  | *   | ** | ** | **  | **  | **  | **    | **    | **    | **    | **    | **    | **  | **     | **  | **    | **  | **     | **  | **    | **  | ** | ** | **  | **  | ** | ** | ** |    |
| SRLZ2      | **    | **  | *   | ** | ** | **  | **  | **  | **    | **    | **    | **    | **    | **    | **  | **     | **  | **    | **  | **     | **  | **    | **  | ** | ** | **  | **  | ** | ** | ** |    |
| MRD        | **    | **  | *   | ** | ** | **  | **  | **  | **    | **    | **    | **    | **    | **    | **  | **     | **  | **    | **  | **     | **  | **    | **  | ** | ** | **  | **  | ** | ** | ** |    |
| SRN        | *     | **  | **  | ** | ** | **  | **  | **  | **    | **    | **    | **    | **    | **    | **  | **     | **  | **    | **  | **     | **  | **    | **  | ** | ** | **  | **  | ** | ** | ** |    |
| RL         | **    | **  | **  | ** | ** | **  | **  | **  | **    | **    | **    | **    | **    | **    | **  | **     | **  | **    | **  | **     | **  | **    | **  | ** | ** | **  | **  | ** | ** | ** |    |
| RD         | **    | **  | **  | ** | ** | **  | **  | **  | **    | **    | **    | **    | **    | **    | **  | **     | **  | **    | **  | **     | **  | **    | *   | ** | ** | **  | **  | ** | ** | *  |    |
| SRL        | **    | **  | **  | ** | ** | **  | **  | **  | **    | **    | **    | *     | **    | **    | **  | **     | **  | **    | **  | **     | **  | **    | **  | ** | ** | **  | **  | ** | *  | ** |    |
| RLI        | **    | **  | **  | ** | ** | **  | **  | **  | **    | **    | **    | **    | **    | **    | **  | **     | **  | **    | **  | **     | **  | **    | **  | ** | ** | **  | **  | ** | ** | ** |    |
| RTD        | **    | **  | *   | ** | ** | **  | *   | **  | **    | **    | **    | **    | **    | **    | **  | **     | **  | **    | **  | **     | **  | **    | **  | ** | ** | **  | **  | ** | ** | ** | ** |
| RL_s1      | **    | **  | *   | ** | ** | **  | **  | **  | **    | **    | **    | **    | **    | **    | **  | **     | **  | **    | **  | **     | **  | **    | **  | ** | ** | **  | **  | ** | ** | ** |    |
| RD_s1      | **    | **  | *   | ** | ** | **  | **  | **  | **    | **    | **    | **    | **    | **    | **  | **     | **  | **    | **  | **     | **  | **    | **  | ** | ** | **  | **  | ** | ** | ** |    |
| RL_s2      | **    | **  | *   | ** | ** | **  | **  | **  | **    | **    | **    | **    | **    | **    | **  | **     | **  | **    | **  | **     | **  | **    | **  | ** | ** | **  | **  | ** | ** | ** |    |
| RD_s2      | **    | **  | *   | ** | ** | **  | **  | **  | **    | **    | **    | **    | **    | **    | **  | **     | **  | **    | **  | **     | **  | **    | **  | ** | ** | **  | **  | ** | ** | ** |    |
| RL_s3      | **    | **  | *   | ** | ** | **  | **  | **  | **    | **    | **    | **    | **    | **    | **  | **     | **  | **    | **  | **     | **  | **    | **  | ** | ** | **  | **  | ** | ** | ** |    |
| RD_s3      | **    | **  | *   | ** | ** | **  | **  | **  | **    | **    | **    | **    | **    | **    | **  | **     | **  | **    | **  | **     | **  | **    | **  | ** | ** | **  | **  | ** | ** | ** |    |
| RL_sub     | **    | **  | *   | ** | ** | **  | **  | **  | **    | **    | **    | **    | **    | **    | **  | **     | **  | **    | **  | **     | **  | **    | **  | ** | ** | **  | **  | ** | ** | ** |    |
| RD_sub     | **    | **  | *   | ** | ** | **  | **  | **  | **    | **    | **    | **    | **    | **    | **  | **     | **  | **    | **  | **     | **  | **    | **  | ** | ** | **  | **  | ** | ** | ** |    |
| RLR_s1/sub | **    | **  | *   | ** | ** | **  | **  | **  | **    | **    | **    | **    | **    | **    | **  | **     | **  | **    | **  | **     | **  | **    | *   | ** | ** | **  | **  | ** | ** | ** |    |
| RM         | **    | **  | **  | ** | ** | **  | **  | **  | **    | **    | **    | **    | **    | **    | **  | **     | **  | **    | **  | **     | **  | **    | **  | ** | ** | **  | **  | ** | ** | ** |    |
| SM         | **    | **  | **  | ** | ** | **  | **  | **  | **    | **    | **    | **    | **    | **    | **  | **     | **  | **    | **  | **     | **  | **    | **  | ** | ** | **  | **  | ** | ** | ** |    |
| TDM        | **    | **  | **  | ** | ** | **  | **  | **  | **    | **    | **    | **    | **    | **    | **  | **     | **  | **    | **  | **     | **  | **    | **  | ** | ** | **  | **  | ** | ** | ** |    |
| RMR        | **    | **  | **  | ** | ** | **  | **  | **  | **    | **    | **    | **    | **    | **    | **  | **     | **  | **    | **  | **     | **  | **    | **  | ** | ** | **  | **  | ** | ** | ** |    |
| SH         | **    | **  | **  | ** | ** | **  | **  | **  | **    | **    | **    | **    | **    | **    | **  | **     | **  | **    | **  | **     | **  | **    | **  | ** | ** | **  | **  | ** | ** | ** |    |
| LN         | **    | **  | **  | ** | ** | **  | **  | **  | **    | **    | **    | **    | **    | **    | **  | **     | **  | **    | **  | **     | **  | **    | **  | ** | ** | **  | **  | ** | ** | ** |    |

\*\* , Correlation is significant at the 0.01 level (2-tailed); \* , Correlation is significant at the 0.05 level (2-tailed). Mathematically linked traits such as RA, RV, RLD and RGR were excluded in the correlation analysis. See Table 3 for the trait descriptions.

**Table S5** Mean values (cluster centers) of five groups generated by *K*-Means clustering analysis for 9 root-related traits in 184 wheat genotypes.

| Root traits       | Cluster#1   | Cluster#2 | Cluster#3    | Cluster#4 | Cluster#5 | <i>F</i> | <i>Sig.</i> |
|-------------------|-------------|-----------|--------------|-----------|-----------|----------|-------------|
| <b>SRN</b>        | <i>9.94</i> | 11.56     | <b>11.81</b> | 11.53     | 10.86     | 1.7      | 0.1430      |
| <b>RL</b>         | <i>1147</i> | 2469      | <b>2949</b>  | 2044      | 1585      | 495      | 0.0000      |
| <b>RLI</b>        | <i>13.0</i> | 20.3      | <b>24.2</b>  | 19.4      | 15.6      | 48.2     | 0.0000      |
| <b>RL_s1</b>      | <i>452</i>  | 824       | <b>908</b>   | 795       | 573       | 50.3     | 0.0000      |
| <b>RL_s2</b>      | <i>383</i>  | 837       | <b>1061</b>  | 697       | 542       | 162      | 0.0000      |
| <b>RL_s3</b>      | <i>312</i>  | 808       | <b>979</b>   | 552       | 469       | 123      | 0.0000      |
| <b>RL_sub</b>     | <i>695</i>  | 1645      | <b>2040</b>  | 1249      | 1011      | 323      | 0.0000      |
| <b>RLR_s1/sub</b> | <b>0.80</b> | 0.54      | <i>0.48</i>  | 0.70      | 0.61      | 4.7      | 0.0010      |
| <b>RM</b>         | <i>96</i>   | 214       | <b>255</b>   | 165       | 133       | 151      | 0.0000      |
| <b>Members</b>    | 32          | 28        | 16           | 56        | 52        |          |             |
| <b>%</b>          | 17.4        | 15.2      | 8.7          | 30.4      | 28.3      |          |             |

Analysis of variance *F* statistics was performed, and both *F* and *P* values for each variable are given. Traits with large *F* values provide the greatest separation among clusters. The number of clusters was set at 5 using the iterate and classify method. Maximum iterations were 10. For each trait, minimums are italicized and maximums are in bold type.

**Table S6** The 184 genotypes of wheat (*Triticum aestivum*) from 37 countries of origin used in this study.

| No. | Name                    | Country of origin <sup>1</sup> | Seed provider | Notes                                                                        |
|-----|-------------------------|--------------------------------|---------------|------------------------------------------------------------------------------|
| 1   | Chinese Spring          | China                          | AGG           | Balfourier <i>et al.</i> (2007) <sup>2</sup>                                 |
| 2   | College Eclipse         | Australia                      | AGG           | Balfourier <i>et al.</i> (2007)                                              |
| 3   | Daeraad                 | South Africa                   | AGG           | Balfourier <i>et al.</i> (2007)                                              |
| 4   | Flint                   | United States                  | AGG           | Balfourier <i>et al.</i> (2007)                                              |
| 5   | Gamenya A               | Australia                      | AGG           | Balfourier <i>et al.</i> (2007)                                              |
| 6   | Hopea                   | Russia                         | AGG           | Balfourier <i>et al.</i> (2007)                                              |
| 7   | Mocha De Espriga Branca | Portugal                       | AGG           | Balfourier <i>et al.</i> (2007)                                              |
| 8   | Pitic 62                | Mexico                         | AGG           | Balfourier <i>et al.</i> (2007); Narayanan <i>et al.</i> (2014) <sup>3</sup> |
| 9   | Redman                  | Canada                         | AGG           | Balfourier <i>et al.</i> (2007); Narayanan <i>et al.</i> (2014)              |
| 10  | Sarrubra                | Russia <sup>3</sup>            | AGG           | Balfourier <i>et al.</i> (2007)                                              |
| 11  | Squareheads Master      | United Kingdom                 | AGG           | Balfourier <i>et al.</i> (2007)                                              |
| 12  | Alma                    | United Kingdom                 | AGG           | Balfourier <i>et al.</i> (2007)                                              |
| 13  | Admonter Fruh           | Austria                        | AGG           | Balfourier <i>et al.</i> (2007)                                              |
| 14  | Andes 56                | Mexico                         | AGG           | Balfourier <i>et al.</i> (2007); Narayanan <i>et al.</i> (2014)              |
| 15  | Arawa                   | New Zealand                    | AGG           | Balfourier <i>et al.</i> (2007)                                              |
| 16  | Ardito                  | Italy                          | AGG           | Balfourier <i>et al.</i> (2007)                                              |
| 17  | Spear                   | Australia                      | CSIRO         | Released 1984                                                                |
| 18  | Coronation              | Canada                         | AGG           | Balfourier <i>et al.</i> (2007)                                              |
| 19  | Africa Mayo             | Kenya                          | AGG           | Balfourier <i>et al.</i> (2007)                                              |
| 20  | Fronthatch              | Kenya                          | AGG           | Balfourier <i>et al.</i> (2007)                                              |
| 21  | Ghurka                  | Australia                      | AGG           | Balfourier <i>et al.</i> (2007)                                              |
| 22  | Kitchener               | Canada                         | AGG           | Balfourier <i>et al.</i> (2007)                                              |
| 23  | Little Club             | United States                  | AGG           | Balfourier <i>et al.</i> (2007); Narayanan <i>et al.</i> (2014)              |
| 24  | Opal                    | Netherlands                    | AGG           | Balfourier <i>et al.</i> (2007)                                              |
| 25  | Orlandi                 | Italy                          | AGG           | Balfourier <i>et al.</i> (2007)                                              |
| 26  | Blondynka               | Poland                         | AGG           |                                                                              |
| 27  | Lang                    | Australia                      | CSIRO         |                                                                              |
| 28  | Richelle                | Tunisia                        | AGG           |                                                                              |
| 29  | Kenya 350               | Kenya                          | AGG           | Balfourier <i>et al.</i> (2007)                                              |
| 30  | Stanley                 | Canada                         | AGG           | Balfourier <i>et al.</i> (2007)                                              |
| 31  | Pamucak                 | Turkey                         | AGG           | Balfourier <i>et al.</i> (2007)                                              |
| 32  | Aurore                  | Australia                      | AGG           | Balfourier <i>et al.</i> (2007)                                              |
| 33  | Gular                   | Australia                      | AGG           | Balfourier <i>et al.</i> (2007)                                              |
| 34  | Seu Seun 27             | South Korea                    | AGG           | Balfourier <i>et al.</i> (2007)                                              |
| 35  | Blueboy                 | United States                  | AGG           | Balfourier <i>et al.</i> (2007)                                              |
| 36  | Lammas                  | United Kingdom                 | AGG           | Balfourier <i>et al.</i> (2007)                                              |
| 37  | Diana                   | Poland                         | AGG           |                                                                              |
| 38  | Tom Thumb               | Mexico                         | AGG           | Balfourier <i>et al.</i> (2007)                                              |
| 39  | Berzataka               | Russia <sup>4</sup>            | AGG           | Balfourier <i>et al.</i> (2007)                                              |
| 40  | Ebro 3                  | Spain                          | AGG           | Balfourier <i>et al.</i> (2007)                                              |
| 41  | Bahatans 87             | Algeria                        | AGG           | Balfourier <i>et al.</i> (2007)                                              |
| 42  | BT-2281                 | Tunisia                        | AGG           | Balfourier <i>et al.</i> (2007)                                              |
| 43  | Agatha                  | Canada                         | AGG           | Balfourier <i>et al.</i> (2007)                                              |
| 44  | Weibullsholm Jo 3045    | Finland                        | AGG           | Balfourier <i>et al.</i> (2007)                                              |
| 45  | Chitlang                | Nepal                          | AGG           |                                                                              |
| 46  | Dhoje                   | Nepal                          | AGG           | Balfourier <i>et al.</i> (2007)                                              |
| 47  | Chirkung                | Nepal                          | AGG           |                                                                              |
| 48  | Benchung                | Nepal                          | AGG           |                                                                              |

## Supplementary data

Chen Y *et al.* (2020) *BMC Plant Biology* **Doi:** 10.1186/s12870-020-02390-8

|     |                      |                     |       |                                 |
|-----|----------------------|---------------------|-------|---------------------------------|
| 49  | Gudel                | Nepal               | AGG   |                                 |
| 50  | Kulung               | Nepal               | AGG   |                                 |
| 51  | Monjo                | Nepal               | AGG   |                                 |
| 52  | Nachipundo           | Nepal               | AGG   |                                 |
| 53  | Jubing               | Nepal               | AGG   |                                 |
| 54  | Junbesi              | Nepal               | AGG   |                                 |
| 55  | Ritak 1              | Nepal               | AGG   |                                 |
| 56  | Chyamtang            | Nepal               | AGG   |                                 |
| 57  | Honggaoan            | Nepal               | AGG   |                                 |
| 58  | Centurk              | United States       | AGG   | Balfourier <i>et al.</i> (2007) |
| 59  | Cotipora             | Brazil              | AGG   | Balfourier <i>et al.</i> (2007) |
| 60  | Candeal De Arevalo   | Portugal            | AGG   | Balfourier <i>et al.</i> (2007) |
| 61  | Dolis Puri           | Russia <sup>3</sup> | AGG   | Balfourier <i>et al.</i> (2007) |
| 62  | Buck Atlantico       | Argentina           | AGG   | Balfourier <i>et al.</i> (2007) |
| 63  | Pato                 | Argentina           | AGG   | Balfourier <i>et al.</i> (2007) |
| 64  | Vakka                | Finland             | AGG   | Balfourier <i>et al.</i> (2007) |
| 65  | Glenlea              | Canada              | AGG   | Balfourier <i>et al.</i> (2007) |
| 66  | Matraderecskei       | Hungary             | AGG   | Balfourier <i>et al.</i> (2007) |
| 67  | Chanate              | Mexico              | AGG   | Balfourier <i>et al.</i> (2007) |
| 68  | Barani 70            | Pakistan            | AGG   | Balfourier <i>et al.</i> (2007) |
| 69  | Nyu Bay              | Japan               | AGG   | Balfourier <i>et al.</i> (2007) |
| 70  | Tau-Bugda            | Russia <sup>3</sup> | AGG   | Balfourier <i>et al.</i> (2007) |
| 71  | Austro Bankut        | Austria             | AGG   | Balfourier <i>et al.</i> (2007) |
| 72  | Apex                 | Canada              | AGG   | Balfourier <i>et al.</i> (2007) |
| 73  | Ferrugineum          | Russia <sup>3</sup> | AGG   | Balfourier <i>et al.</i> (2007) |
| 74  | Nong Da 141          | China               | AGG   | Balfourier <i>et al.</i> (2007) |
| 75  | Songlen              | Iraq                | CSIRO | Drought tolerant                |
| 76  | Caribo               | Germany             | AGG   | Balfourier <i>et al.</i> (2007) |
| 77  | Minturk              | United States       | AGG   | Balfourier <i>et al.</i> (2007) |
| 78  | Canuck               | Canada              | AGG   | Balfourier <i>et al.</i> (2007) |
| 79  | Limpopo              | Zimbabwe            | AGG   | Balfourier <i>et al.</i> (2007) |
| 80  | Balkan               | Yugoslavia          | AGG   | Balfourier <i>et al.</i> (2007) |
| 81  | Arkas                | France              | AGG   | Balfourier <i>et al.</i> (2007) |
| 82  | Rongotea             | New Zealand         | AGG   | Balfourier <i>et al.</i> (2007) |
| 83  | Buck Buck S          | Mexico              | AGG   | Balfourier <i>et al.</i> (2007) |
| 84  | Emu S                | Mexico              | AGG   | Balfourier <i>et al.</i> (2007) |
| 85  | Horoshiri-Komugi     | Japan               | AGG   | Balfourier <i>et al.</i> (2007) |
| 86  | Benni                | United States       | AGG   | Balfourier <i>et al.</i> (2007) |
| 87  | Katyl                | Australia           | AGG   | Balfourier <i>et al.</i> (2007) |
| 88  | Ogosta               | Bulgaria            | AGG   | Balfourier <i>et al.</i> (2007) |
| 89  | Akadaruma            | Japan               | AGG   | Balfourier <i>et al.</i> (2007) |
| 90  | Bass                 | Australia           | AGG   | Balfourier <i>et al.</i> (2007) |
| 91  | Compton              | United States       | AGG   | Balfourier <i>et al.</i> (2007) |
| 92  | Corin                | United Kingdom      | AGG   | Balfourier <i>et al.</i> (2007) |
| 93  | Comet                | Australia           | AGG   | Balfourier <i>et al.</i> (2007) |
| 94  | Opata 85             | Mexico              | AGG   | Balfourier <i>et al.</i> (2007) |
| 95  | Wattines             | Germany             | AGG   | Balfourier <i>et al.</i> (2007) |
| 96  | Turda 81             | Romania             | AGG   | Balfourier <i>et al.</i> (2007) |
| 97  | Recital              | France              | AGG   | Balfourier <i>et al.</i> (2007) |
| 98  | Adular               | Germany             | AGG   | Balfourier <i>et al.</i> (2007) |
| 99  | Granit               | Germany             | AGG   | Balfourier <i>et al.</i> (2007) |
| 100 | Dal'nevostochnaya 10 | Russia <sup>3</sup> | AGG   | Balfourier <i>et al.</i> (2007) |
| 101 | Corsodor             | France              | AGG   | Balfourier <i>et al.</i> (2007) |
| 102 | 3716-1               | Bulgaria            | AGG   | Balfourier <i>et al.</i> (2007) |
| 103 | Mv Ma                | Bulgaria            | AGG   | Balfourier <i>et al.</i> (2007) |
| 104 | Flamura 85           | Romania             | AGG   | Balfourier <i>et al.</i> (2007) |
| 105 | Axona                | United Kingdom      | AGG   | Balfourier <i>et al.</i> (2007) |

## Supplementary data

Chen Y *et al.* (2020) *BMC Plant Biology* **Doi:** 10.1186/s12870-020-02390-8

|     |                  |                     |            |                                                                 |
|-----|------------------|---------------------|------------|-----------------------------------------------------------------|
| 106 | Genesis          | Canada              | AGG        |                                                                 |
| 107 | Hana             | Czech Republic      | AGG        | Balfourier <i>et al.</i> (2007)                                 |
| 108 | Kirac 66         | Turkey              | AGG        | Balfourier <i>et al.</i> (2007)                                 |
| 109 | Dneprovskaya 155 | Russia <sup>3</sup> | AGG        | Balfourier <i>et al.</i> (2007)                                 |
| 110 | Szoke (GK)       | Hungary             | AGG        | Balfourier <i>et al.</i> (2007)                                 |
| 111 | Grenier          | France              | AGG        | Balfourier <i>et al.</i> (2007)                                 |
| 112 | Sary Bugda       | Russia <sup>3</sup> | AGG        |                                                                 |
| 113 | Renan            | France              | AGG        | Balfourier <i>et al.</i> (2007)                                 |
| 114 | Landrace         | Armenia             | AGG        |                                                                 |
| 115 | Apache           | France              | AGG        | Balfourier <i>et al.</i> (2007)                                 |
| 116 | Kraka            | Denmark             | AGG        | Balfourier <i>et al.</i> (2007)                                 |
| 117 | Cadenza          | United Kingdom      | AGG        | Balfourier <i>et al.</i> (2007)                                 |
| 118 | Soor Ghanum      | Pakistan            | AGG        |                                                                 |
| 119 | W7984            | Mexico              | AGG        |                                                                 |
| 120 | Strubes Dickopf  | Germany             | AGG        | Balfourier <i>et al.</i> (2007)                                 |
| 121 | Bonnie Rock      | Australia           | InterGrain | WA top 10 cultivar                                              |
| 122 | Calingiri        | Australia           | InterGrain | WA top 10 cultivar                                              |
| 123 | Cobra            | Australia           | LPB        | WA top 10 cultivar                                              |
| 124 | Corack           | Australia           | AGT        | WA top 10 cultivar                                              |
| 125 | Justica CI Plus  | Australia           | AGT        | WA top 10 cultivar                                              |
| 126 | Mace             | Australia           | AGT        | WA top 10 cultivar; released in 2014                            |
| 127 | Magenta          | Australia           | InterGrain | WA top 10 cultivar                                              |
| 128 | Stiletto         | Australia           | ARI        | WA top 10 cultivar                                              |
| 129 | Wyalkatchem      | Australia           | InterGrain | WA top 10 cultivar; released in 2001                            |
| 130 | Yitpi            | Australia           | ARI        | WA top 10 cultivar                                              |
| 131 | Bremer           | Australia           | AGT        | Recent release                                                  |
| 132 | Harper           | Australia           | InterGrain | Recent release                                                  |
| 133 | Hydra            | Australia           | InterGrain | Recent release                                                  |
| 134 | Impress CI Plus  | Australia           | InterGrain | Recent release                                                  |
| 135 | Supreme          | Australia           | InterGrain | Recent release; Narayanan <i>et al.</i> (2014)                  |
| 136 | Trojan           | Australia           | LPB        | Recent release                                                  |
| 137 | Zen              | Australia           | InterGrain | Recent release                                                  |
| 138 | Drysdale         | Australia           | CSIRO      | Saradadevi <i>et al.</i> (2014) <sup>5</sup> ; released in 2002 |
| 139 | Grenade CI Plus  | Australia           | AGT        | Recent release; drought tolerant                                |
| 140 | Igw-3119         | Australia           | CSIRO      | Saradadevi <i>et al.</i> (2014)                                 |
| 141 | Igw-3262         | Australia           | CSIRO      | Saradadevi <i>et al.</i> (2014)                                 |
| 142 | Scepter          | Australia           | AGT        | Recent release; drought tolerant                                |
| 143 | Beyaz Tir        | Turkey              | AWCC       |                                                                 |
| 144 | Ciano 67         | Mexico              | AWCC       |                                                                 |
| 145 | Downy            | United States       | AWCC       |                                                                 |
| 146 | Gleennson 81     | Mexico              | AWCC       |                                                                 |
| 147 | Hobbit Sib       | United Kingdom      | AWCC       |                                                                 |
| 148 | Hongmang         | China               | AWCC       |                                                                 |
| 149 | IBIS             | Denmark             | AWCC       |                                                                 |
| 150 | Kauz Dwarf       | Mexico              | AWCC       |                                                                 |
| 151 | Kauz S           | Mexico              | AWCC       |                                                                 |
| 152 | Maris Templar    | United Kingdom      | AWCC       |                                                                 |
| 153 | PI 74494         | Russia <sup>3</sup> | AWCC       |                                                                 |
| 154 | Seri 82          | Mexico              | AWCC       | Narayanan <i>et al.</i> (2014)                                  |
| 155 | Sonora 64        | Mexico              | AWCC       | Narayanan <i>et al.</i> (2014)                                  |
| 156 | Sportsman        | United Kingdom      | AWCC       |                                                                 |
| 157 | Tincurrin        | Australia           | AWCC       |                                                                 |
| 158 | Yecora           | Mexico              | AWCC       |                                                                 |
| 159 | Kauz Tall        | Mexico              | AWCC       |                                                                 |
| 160 | AMC 71           | Iraq                | CSIRO      | Drought tolerant                                                |
| 161 | Condor           | Australia           | CSIRO      | Released in 1997                                                |



## Supplementary data

Chen Y *et al.* (2020) *BMC Plant Biology* **Doi:** 10.1186/s12870-020-02390-8

|     |            |           |       |                                 |
|-----|------------|-----------|-------|---------------------------------|
| 162 | Cranbrook  | Australia | CSIRO |                                 |
| 163 | Egawildy   | Australia | CSIRO | Balfourier <i>et al.</i> (2007) |
| 164 | Excalibar  | Australia | CSIRO |                                 |
| 165 | Frame      | Australia | CSIRO | Released in 1994                |
| 166 | Gamenya B  | Australia | CSIRO | Balfourier <i>et al.</i> (2007) |
| 167 | gladius    | Australia | CSIRO | Released in 2007                |
| 168 | Halberd    | Australia | CSIRO | Released in 1969                |
| 169 | Hartog     | Australia | CSIRO | Narayanan <i>et al.</i> (2014)  |
| 170 | Heron      | Australia | CSIRO | Released in 1958                |
| 171 | Janz       | Australia | CSIRO | Released in 1989                |
| 172 | Kalannie   | Australia | CSIRO |                                 |
| 173 | Kennedy    | Australia | CSIRO |                                 |
| 174 | Krichauff  | Australia | CSIRO | Released in 1997                |
| 175 | Lincoln    | Australia | CSIRO | More tillers                    |
| 176 | Livingston | Australia | CSIRO |                                 |
| 177 | Machete    | Australia | CSIRO |                                 |
| 178 | Magsil 30  | Australia | CSIRO |                                 |
| 179 | RAC 875    | Australia | CSIRO |                                 |
| 180 | SB 034     | Mexico    | CSIRO |                                 |
| 181 | SB 072     | Mexico    | CSIRO |                                 |
| 182 | Silverstar | Australia | CSIRO |                                 |
| 183 | Sunco      | Australia | CSIRO |                                 |
| 184 | Warigal    | Australia | CSIRO |                                 |

### Notes:

<sup>1</sup> County of origin (number of genotypes): Australia (55), Mexico (18), Nepal (13), Russia (10), Canada (9), United Kingdom (9), United States (8), France (6), Germany (5), Bulgaria (3), China (3), Japan (3), Kenya (3), Turkey (3), Argentina (2), Austria (2), Denmark (2), Finland (2), Hungary (2), Iraq (2), Italy (2), New Zealand (2), Pakistan (2), Poland (2), Portugal (2), Romania (2), Tunisia (2), Algeria (1), Armenia (1), Brazil (1), Czech Republic (1), Netherlands (1), South Africa (1), South Korea (1), Spain (1), Yugoslavia (1), Zimbabwe (1). Continent of origin (number of genotypes): Africa (10), Asia (30), Europe (51), North America (35), Oceania (57) and South America (1).

<sup>2</sup> Balfourier F, Roussel V, Strelchenko P, Exbrayat-Vinson F, Sourdille P, Boutet G, Koenig J, Ravel C, Mitrofanova O, Beckert M, Charmet G (2007) A worldwide bread wheat core collection arrayed in a 384-well plate. *Theoretical and Applied Genetics*. 114(7): 1265–75.

<sup>3</sup> Narayanan S, Mohan A, Gill KS, Prasad PV (2014) Variability of root traits in spring wheat germplasm. *PLoS One* 9: e100317.

<sup>4</sup> The country of origin of these nine genotypes originally recorded as “Former Soviet Union” were combined with “Russia” in this study.

<sup>5</sup> Saradadevi R, Bramley H, Siddique KH, Edwards E, Palta JA (2014) Contrasting stomatal regulation and leaf ABA concentrations in wheat genotypes when split root systems were exposed to terminal drought. *Field Crops Research*. 165: 5–14.

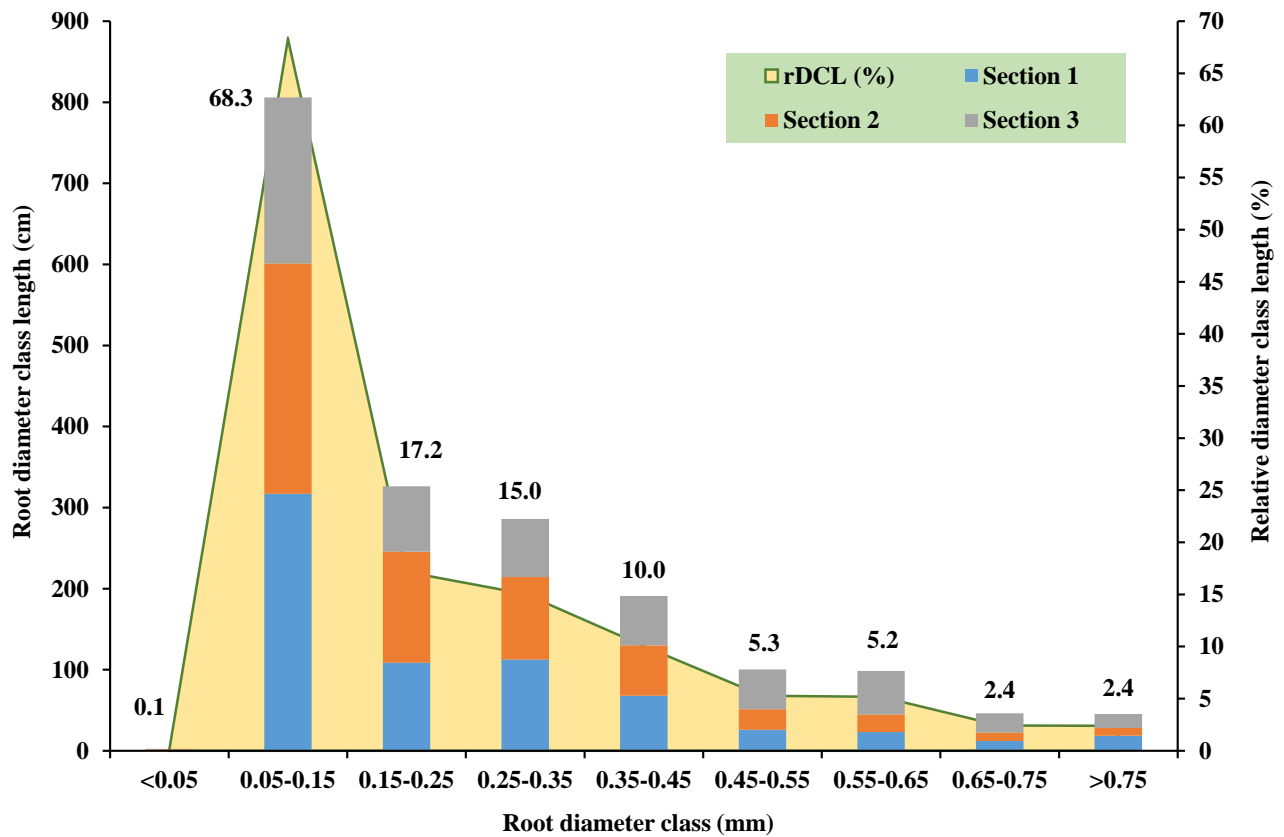

**Fig. S1.** Root diameter class length (DCL, cm) in sections and relative diameter class length (rDCL, %) among 184 wheat genotypes grown in a semi-hydroponic phenotyping platform 35 days after transplanting. Percentage values for rDCL in each diameter class are plotted on the secondary axis. Mean DCL values in each root section are presented with SEs for the total root length in the respective root diameter class.

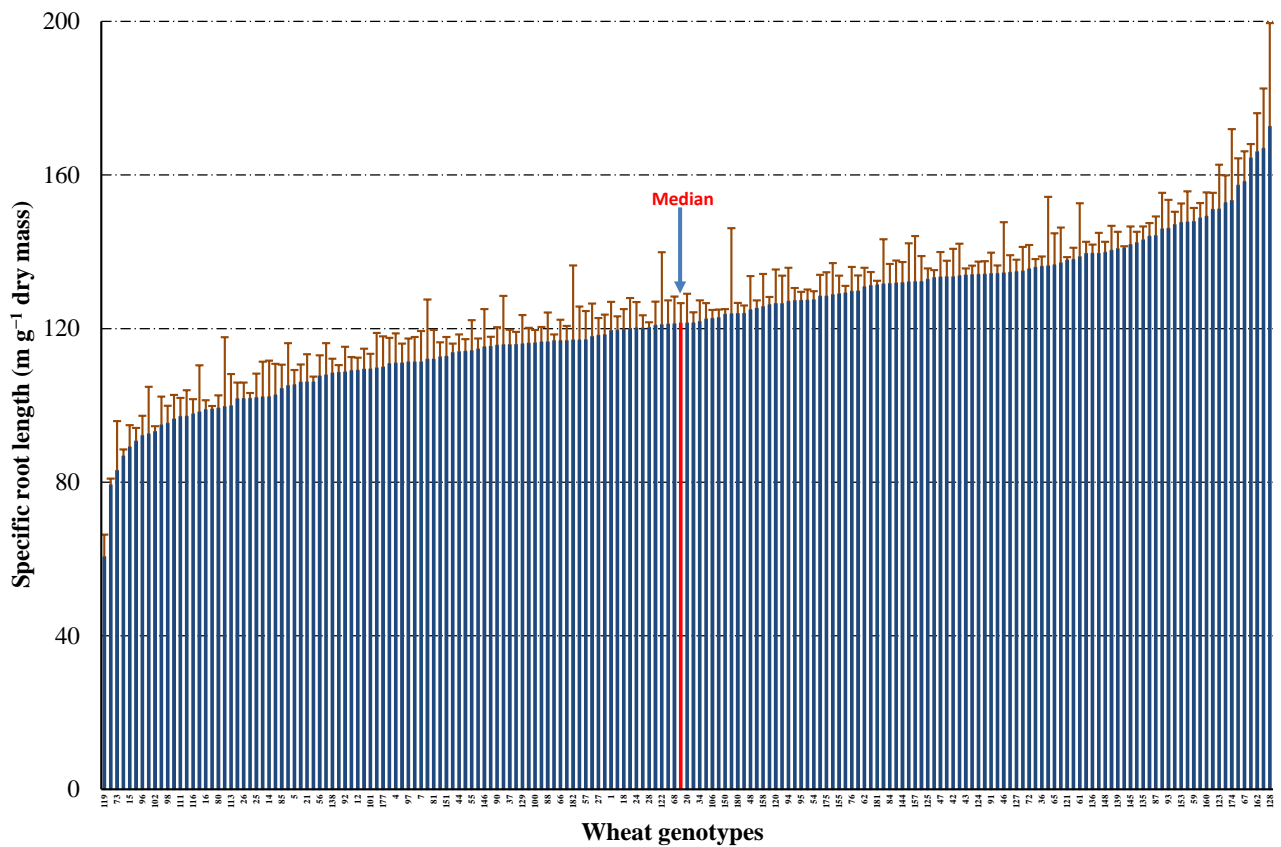

**Fig. S2.** Phenotypic variation in specific root length (SRL) among 184 wheat genotypes grown in a semi-hydroponic phenotyping platform 35 days after transplanting. Data were plotted from the lowest to the highest SRL values. The median value for all genotypes is presented (red bar).

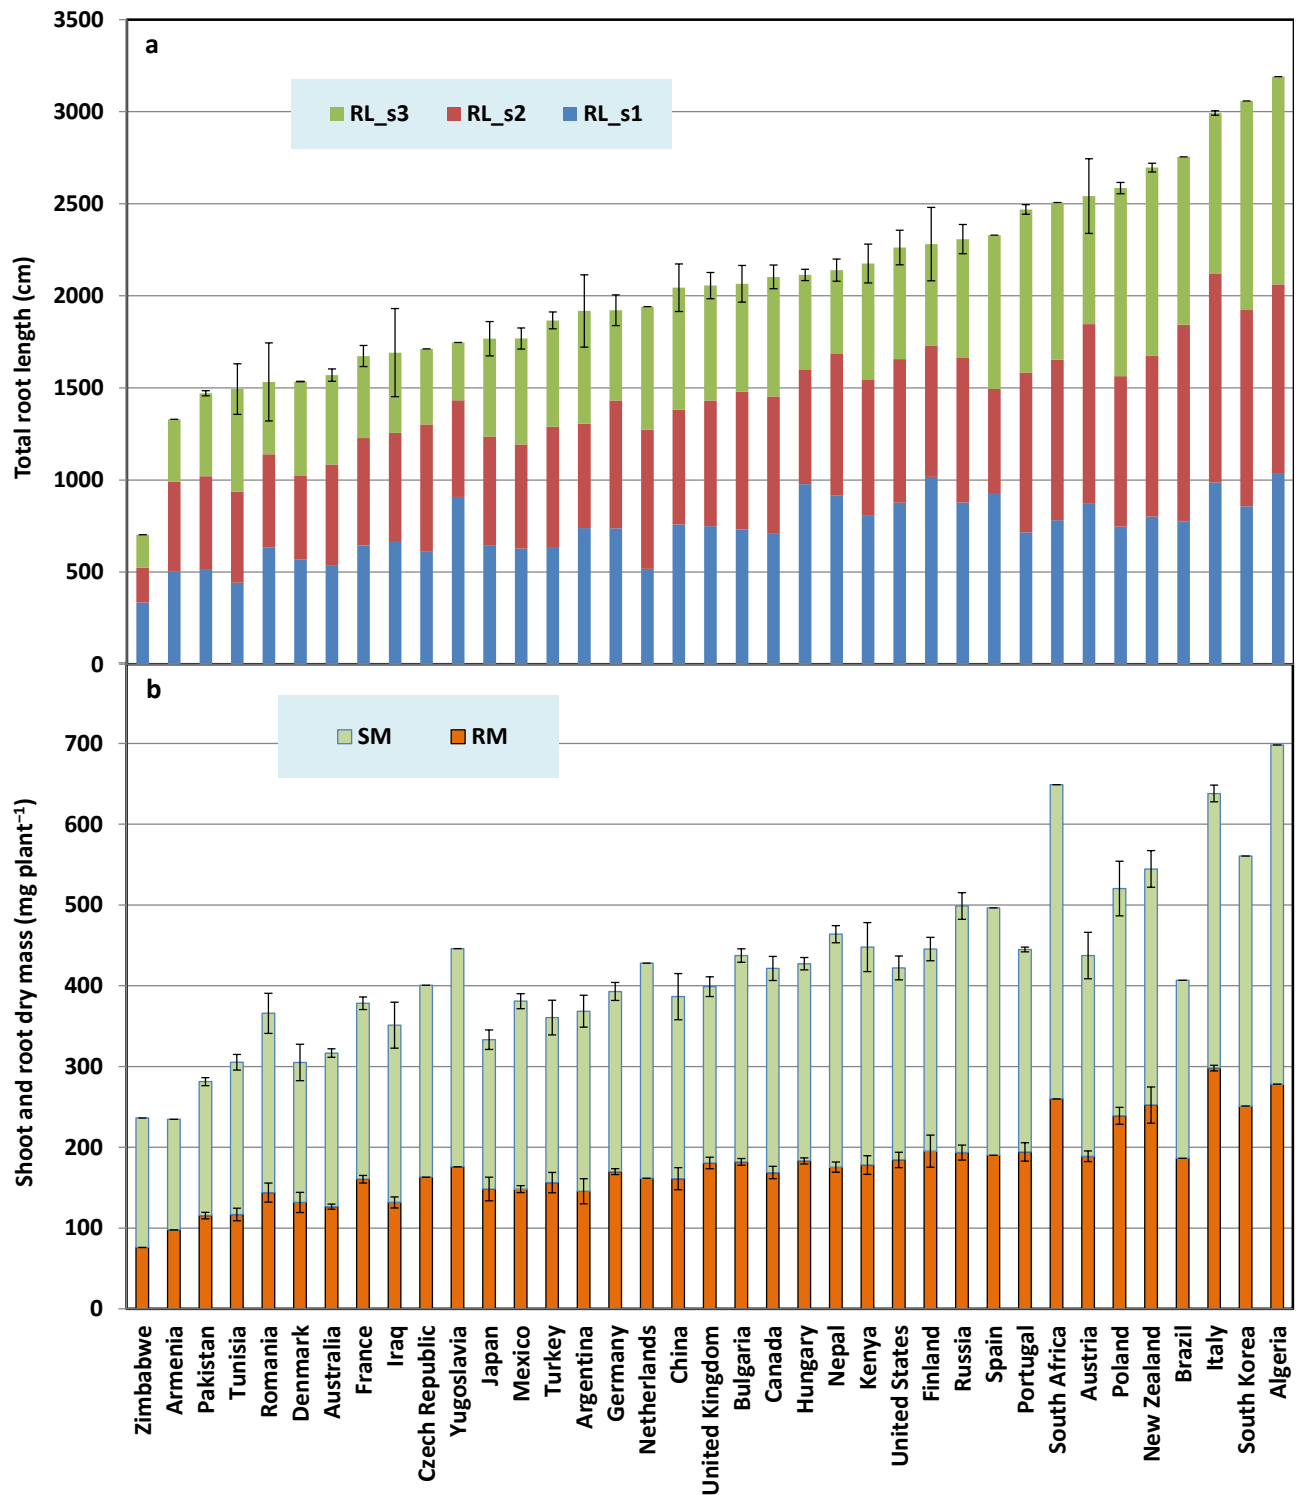

**Fig. S3** Variation among the 37 countries of origin in (a) total root length, (b) shoot and root dry mass (SM and RM, respectively) in 184 wheat genotypes grown in a semi-hydroponic phenotyping platform 35 days after transplanting. Root data are the means for each country. Total root length in section 1 (RL\_s1, 0–20 cm), section 2 (RL\_s2, 20–40 cm), and section 3 (RL\_s3, 40–110 cm)  $\pm$  SE of total root length of all sections is presented. Country names are ordered by the total root length value. The number of genotypes in each country varied and ranged from one to 55 (see Table S3).

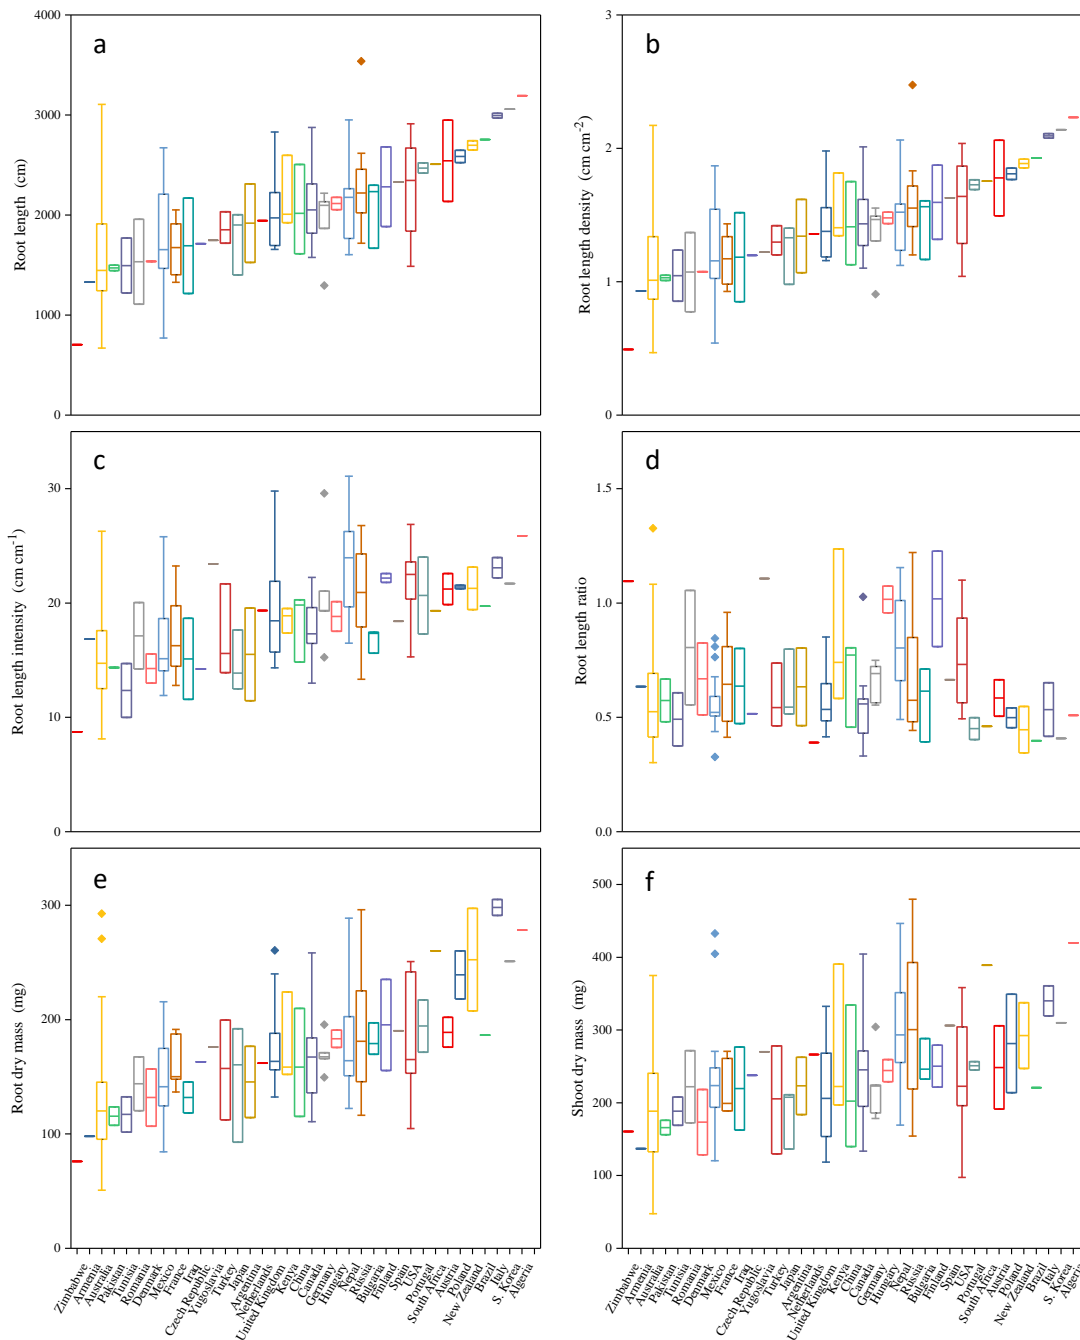

**Fig. S4** Variation among the 37 countries of origin in (a) total root length, (b), root length density, (c) root length intensity, (d) root length ratio, (e) root dry mass, and (f) shoot dry mass in 184 wheat genotypes grown in a semi-hydroponic phenotyping platform 35 days after transplanting. Country names are ordered by the median values of root length from least to most. The boxplots were confined to the first and third quartile with the middle lines being the median. The number of genotypes in each country varied and ranged from one to 55 (see Table S3).

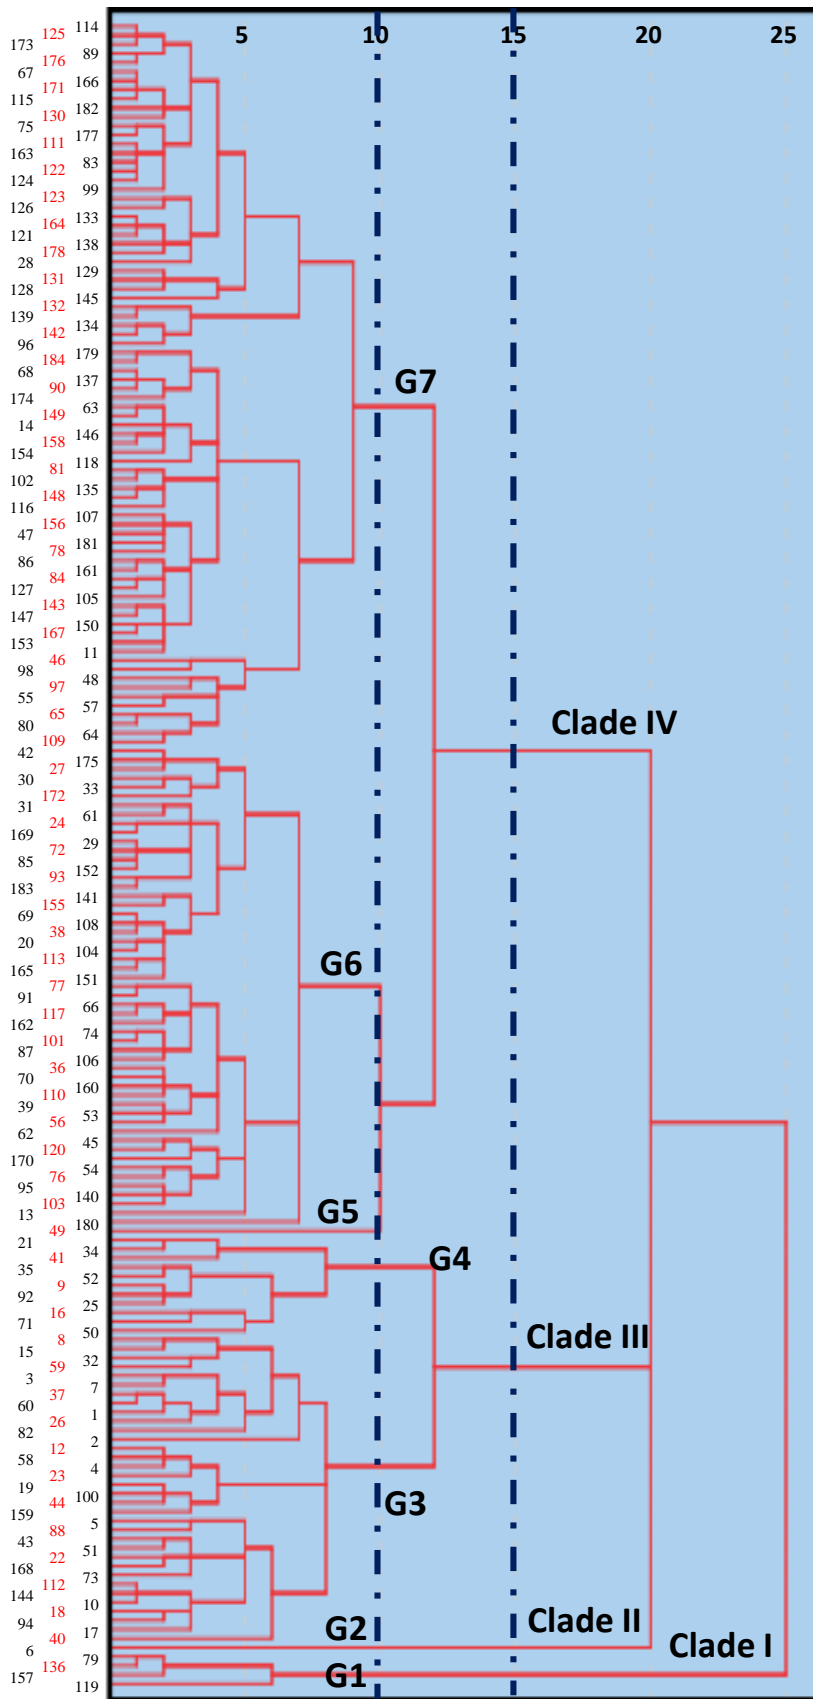

**Fig. S5.** Dendrogram of agglomerative hierarchical clustering (AHC) using the average linkage method with squared Euclidean distance as the interval measurement on 19 selected root traits with CVs  $\geq 0.25$ . The 184 wheat genotypes were assigned to one of four general clades (Clade I, II, III or IV) at a rescaled distance of 15 (left dashed line) containing seven groups (G1 to G7) at a rescaled distance of 10 (right dashed line). See Table S3 for a list of the 184 wheat genotypes used in this study.
